# Supplementary material for: HS-SPME Gas Chromatography Approach for Underivatized Acrylamide Determination in Biscuits
Source: MDPI journal article supplement (doi:10.3390/foods10092183), 2021-09-14
Supplement: s1 [file s1]

## **Supplementary data**

### **HS-SPME gas chromatography approach for underivatized acrylamide determination in biscuits**

**Cláudia P. Passos\*, Sílvia Petronilho, António F. Serôdio, Andreia C.M. Neto, Dylan Torres, Alisa Rudnitskaya, Cláudia Nunes, Kristína Kukurová, Zuzana Ciesarová, Sílvia M. Rocha and Manuel A. Coimbra**

- Correspondence: [cpassos@ua.pt](mailto:cpassos@ua.pt); Tel.: + 351 234 370706

## Table of Contents

|                                                                                                                                                                                                                                                                                    |   |
|------------------------------------------------------------------------------------------------------------------------------------------------------------------------------------------------------------------------------------------------------------------------------------|---|
| Table S1. List of ingredients used in the biscuit recipes. ....                                                                                                                                                                                                                    | 3 |
| Table S2. Types of commercially available fibre coatings used in this work.....                                                                                                                                                                                                    | 3 |
| Figure S1. Example of a GC-FID chromatogram obtained for AA with a concentration of 5 mg/vial using a PA fibre. ....                                                                                                                                                               | 4 |
| Figure S2. GC-MS chromatograms obtained for (a): (left) standard AA solution (8 µg/vial) and (right) biscuits sample with AA detection (retention time: 9.31 min); ion extraction spectrum of AA using $m/z$ 71 and 55 (b), and literature full scan spectrum data for AA (c)..... | 5 |

**Table S1. List of ingredients used in the biscuit recipes.**

| Original                                                                      | Modifications           |                                                                    |               |
|-------------------------------------------------------------------------------|-------------------------|--------------------------------------------------------------------|---------------|
|                                                                               | Recipe 1                | Recipe 2                                                           | Recipe 3      |
| Cereals (68%):<br>wheat flour, rice flour,<br>whole wheat flour, rye<br>flour | ✓                       | Substitution of<br>50% of the wheat<br>flour content rice<br>flour | ✓             |
| Sunflower oil                                                                 | ✓                       | ✓                                                                  | ✓             |
| Sugar                                                                         | ✓                       | ✓                                                                  | ✓             |
| Glucose-fructose syrup                                                        | ✓                       | ✓                                                                  | ✓             |
| Salt                                                                          | ✓                       | ✓                                                                  | ✓             |
| Raising agents<br>(Sodium, Calcium and<br>Ammonium<br>carbonates)             | ✓                       | ✓                                                                  | ✓             |
| Vitamins                                                                      | ✓                       | ✓                                                                  | ✓             |
| Skimmed milk                                                                  | ✓                       | ✓                                                                  | ✓             |
| -                                                                             | + 3.5%<br>asparaginase* | -                                                                  | + 2% pectate* |

\* w/w, in relation to the total flour content.

**Table S2.** Types of commercially available fibre coatings used in this work [36].

| Stationary phase | Coating (µm) | Polarity | Extraction mechanism |
|------------------|--------------|----------|----------------------|
| PDMS             | 100          | Nonpolar | Absorption           |
| PA               | 85           | Polar    | Absorption           |
| CW/DVB*          | 65           | Polar    | Adsorption           |
| CAR/PDMS         | 75           | Bipolar  | Adsorption           |
| PDMS/DVB         | 65           | Bipolar  | Adsorption           |
| DVB/CAR/PDMS**   | 50/30        | Bipolar  | Adsorption           |

PDMS- polydimethylsiloxane; PA- polyacrylate; CW- Carbowax; CAR – carboxen; DVB – divinylbenzene. \* This fibre has been taken out from the market. \*\* This stationary phase comprises a 50/30 DVB/CAR on PDMS fibre.

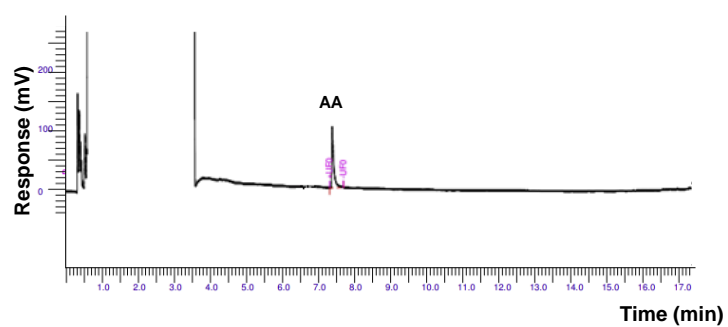

**Figure S1.** Example of a GC-FID chromatogram obtained for AA with a concentration of 5 mg/vial using a PA fibre.

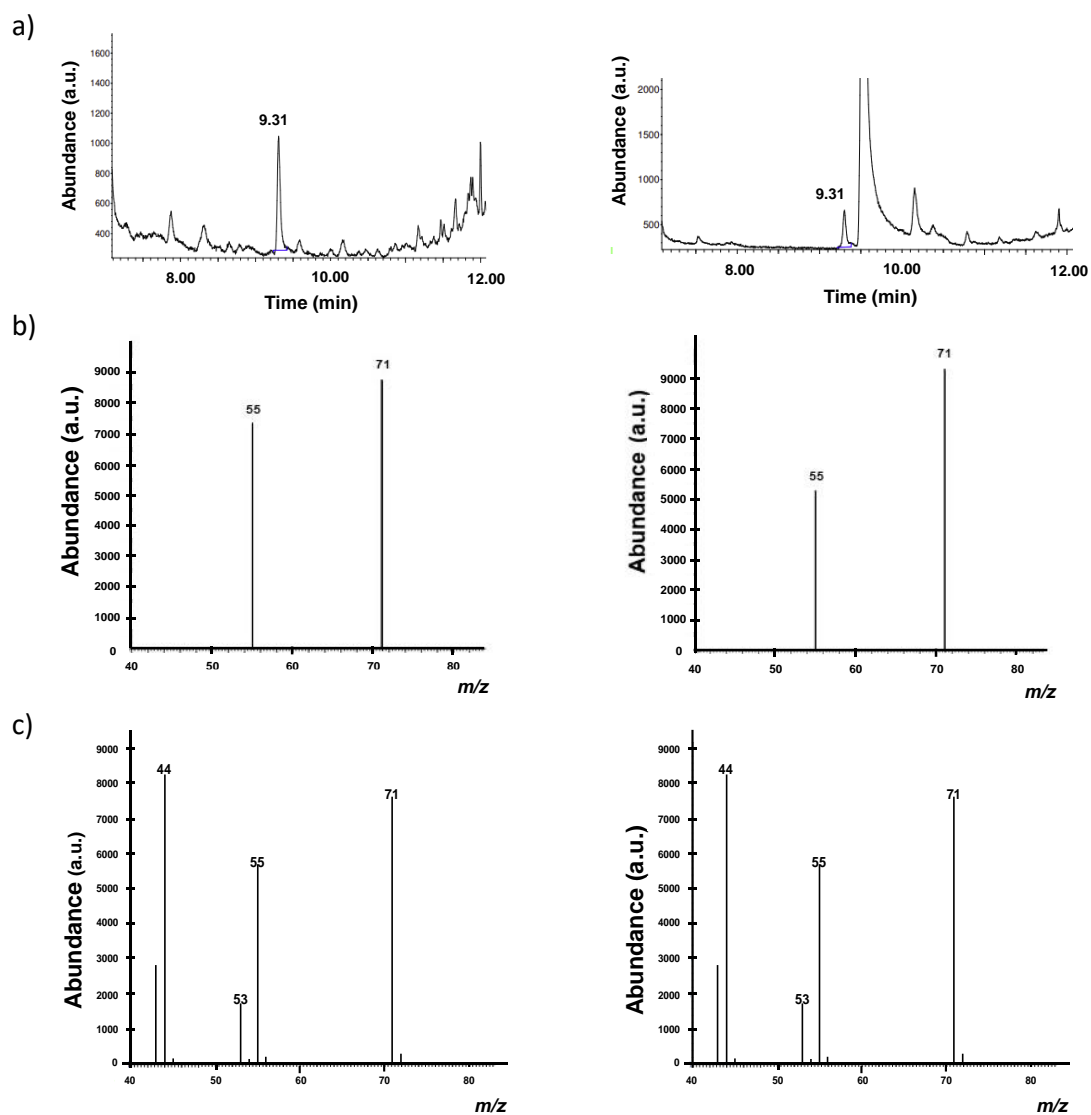

**Figure S2.** GC-MS chromatograms obtained for (a): (**left**) standard AA solution (8  $\mu\text{g/vial}$ ) and (**right**) biscuits sample with AA detection (retention time: 9.31 min); ion extraction spectrum of AA using  $m/z$  71 and 55 (b), and literature full scan spectrum data for AA (c).
